# Supplementary material for: One-pot synthesis of highly substituted poly(furopyrimidine)s via catalyst-free multicomponent polymerizations of diisocyanides, N,N′-dimethylbarbituric acid, and dialdehyde
Source: Royal Society of Chemistry journal article supplement (doi:10.1039/d1ra09336c), 2022-01-01
Supplement: d1ra09336c1.pdf [file d1ra09336c1.pdf]

## Supporting Information

**One-Pot Synthesis of Highly Substituted Poly(fuopyrimidine)s via  
Catalyst-Free Multicomponent Polymerizations of Diisocyanides,  
*N,N'*-dimethylbarbituric acid, and dialdehyde**

Lichao Dong,\* Nan Li, Hang Yuan, Meng Wu

*Aerospace Institute of Advanced Materials & Processing Technology, Beijing, China, 100074*

\*Corresponding authors.

E-mail: 610557405@qq.com

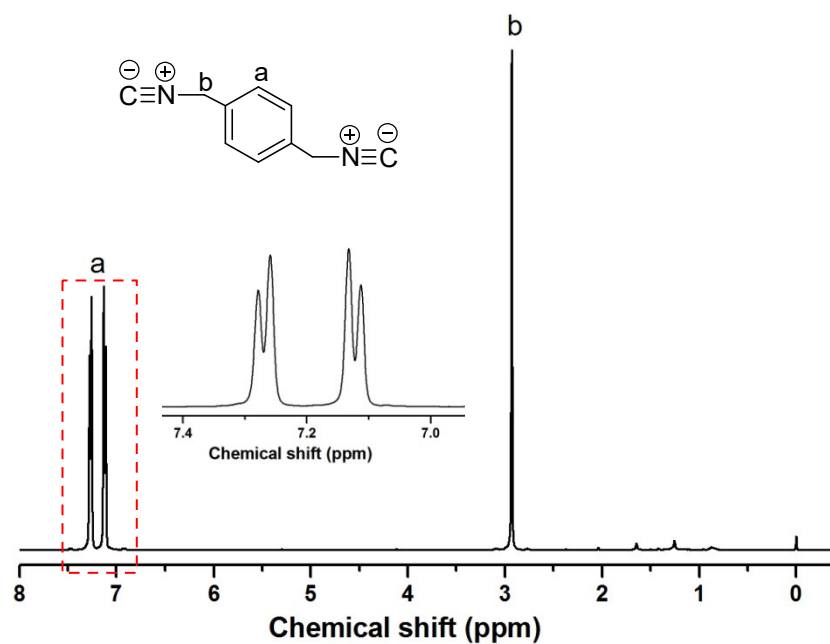

Figure S1 The  $^1\text{H-NMR}$  spectrum of 1,4-bis(isocyanomethyl)benzene in  $\text{CDCl}_3$ .

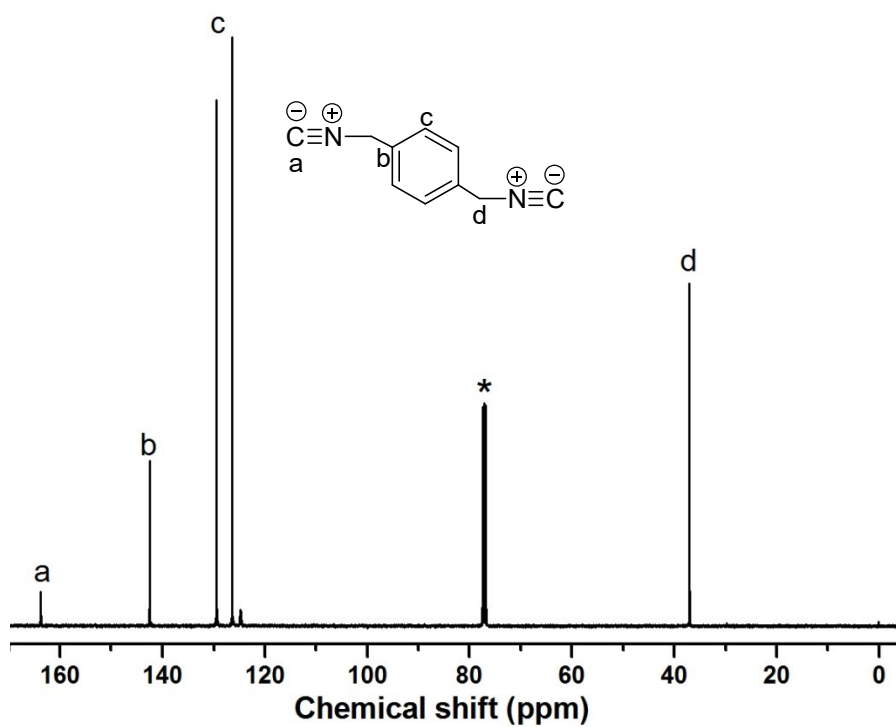

Figure S2 The  $^{13}\text{C-NMR}$  spectrum of 1,4-bis(isocyanomethyl)benzene in  $\text{CDCl}_3$ .
